# Supplementary material
Source: Springer Nature journal article supplement (https://www.springermedizin.de/resource/supplementary/13054_2012_1673_MOESM5_ESM.pdf/9711178)

**A**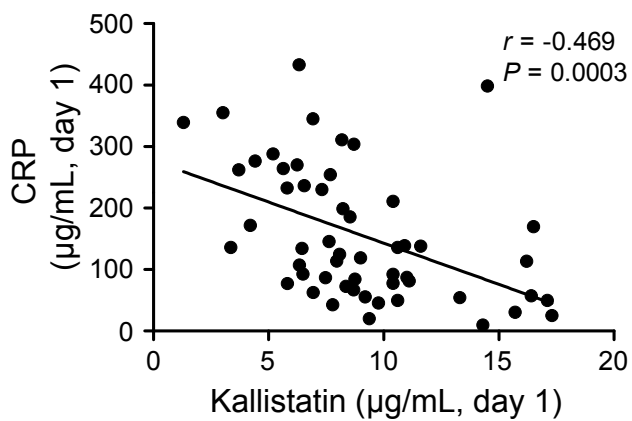**B**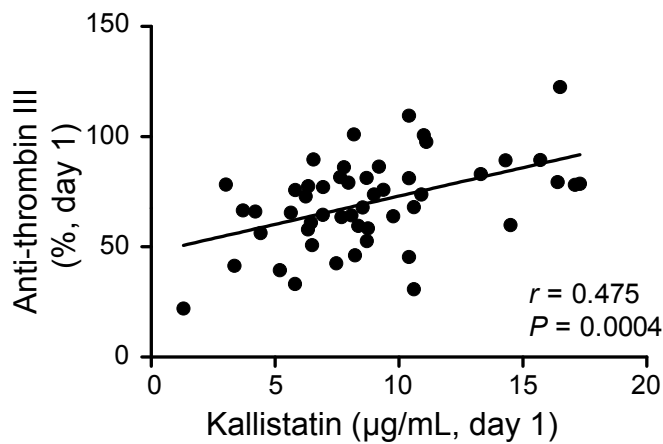**C**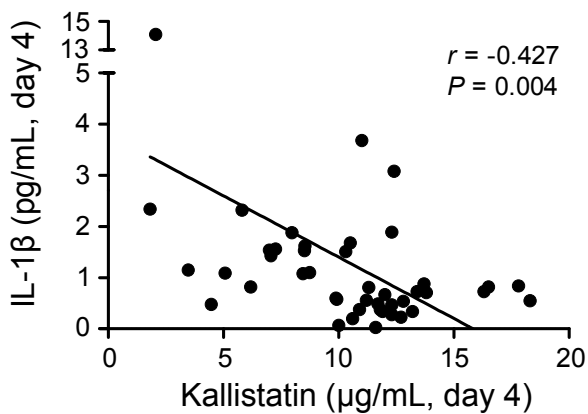**D**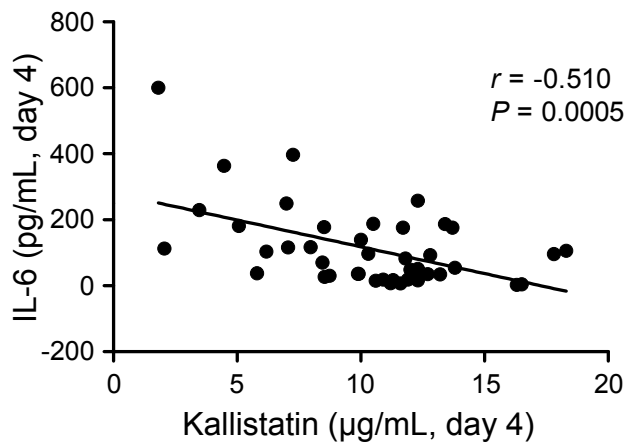**E**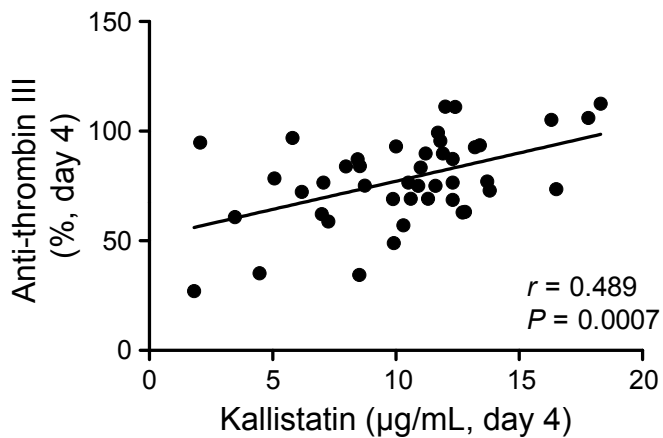**F**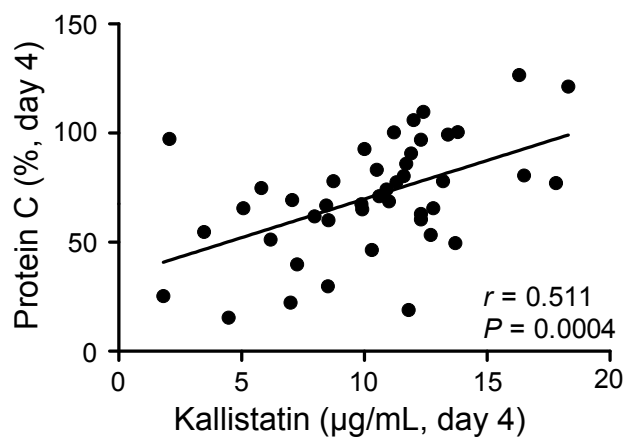

Supplement: MOESM5 [file 9711178]
